# Supplementary material for: Relationships between luminescence properties and polyhedron distortion in Ca9−x−y−zMgxSryBazCe(PO4)7:Eu2+,Mn2+
Source: Royal Society of Chemistry journal article supplement (doi:10.1039/c7tc02833d), 2017-01-01
Supplement: c7tc02833d1.pdf [file c7tc02833d1.pdf]

Table S1 The bond length of Ce-O in  $(\text{Ca, Mg, Sr, Ba})_9\text{Ce}(\text{PO}_4)_7$ .

|                   | $\text{Ca}_9\text{Ce}(\text{PO}_4)_7$ | $\text{Ca}_{8.4}\text{Mg}_{0.6}\text{Ce}(\text{PO}_4)_7$ | $\text{Ca}_{8.4}\text{Sr}_{0.6}\text{Ce}(\text{PO}_4)_7$ | $\text{Ca}_{8.4}\text{Ba}_{0.6}\text{Ce}(\text{PO}_4)_7$ |
|-------------------|---------------------------------------|----------------------------------------------------------|----------------------------------------------------------|----------------------------------------------------------|
| Ce-O6             | 2.267                                 | 2.375                                                    | 4.207                                                    | 4.420                                                    |
| Ce-O6             | 2.267                                 | 2.375                                                    | 4.207                                                    | 4.420                                                    |
| Ce-O6             | 2.267                                 | 2.375                                                    | 4.207                                                    | 4.420                                                    |
| Ce-O9             | 2.339                                 | 2.538                                                    | 2.510                                                    | 2.465                                                    |
| Ce-O9             | 2.339                                 | 2.538                                                    | 2.510                                                    | 2.465                                                    |
| Ce-O9             | 2.339                                 | 2.538                                                    | 2.510                                                    | 2.465                                                    |
| Average value (Å) | 2.303                                 | 2.456                                                    | 3.358                                                    | 3.442                                                    |

Table S2 Side length of [Ce-O] polyhedron in  $(\text{Ca, Mg, Sr, Ba})_9\text{Ce}(\text{PO}_4)_7$ .

| Distance of $\text{O}_i\text{-O}_j$ in [Ce-O] polyhedron in $\text{Ca}_{8.4}\text{Ce}(\text{PO}_4)_7:0.6\text{RE}$ (Å) | RE= $\text{Ca}^{2+}$ | RE= $\text{Mg}^{2+}$ | RE= $\text{Sr}^{2+}$ | RE= $\text{Ba}^{2+}$ |
|------------------------------------------------------------------------------------------------------------------------|----------------------|----------------------|----------------------|----------------------|
| O9-O9                                                                                                                  | 3.343                | 2.816                | 4.096                | 2.831                |
| O9-O9                                                                                                                  | 3.343                | 2.816                | 4.096                | 2.831                |
| O9-O9                                                                                                                  | 3.343                | 2.816                | 4.096                | 2.831                |
| O6-O6                                                                                                                  | 2.549                | 5.660                | 6.804                | 7.342                |
| O6-O6                                                                                                                  | 2.549                | 5.660                | 6.804                | 7.342                |
| O6-O6                                                                                                                  | 2.549                | 5.660                | 6.804                | 7.342                |
| O6-O9                                                                                                                  | 3.623                | 3.994                | 4.238                | 4.556                |
| O6-O9                                                                                                                  | 3.623                | 3.994                | 4.238                | 4.556                |
| O6-O9                                                                                                                  | 3.623                | 3.994                | 4.238                | 4.556                |
| O6-O9                                                                                                                  | 3.404                | 3.961                | 4.067                | 5.118                |
| O6-O9                                                                                                                  | 3.404                | 3.961                | 4.067                | 5.118                |
| O6-O9                                                                                                                  | 3.404                | 3.961                | 4.067                | 5.118                |
| Standard Deviation                                                                                                     | 0.406                | 1.013                | 1.158                | 1.612                |

Table S3 The bond length of Eu-O in  $(\text{Ca, Mg, Sr, Ba})_{8.94}\text{Ce}(\text{PO}_4)_7:0.06\text{Eu}^{2+}$ .

| Distance of Ca3/Eu3-O <sub>i</sub> in [Ca3/Eu3-O] polyhedron in $\text{Ca}_{8.34}\text{Ce}(\text{PO}_4)_7:0.06\text{Eu}^{2+}$ , 0.6RE (Å) | RE=Ca <sup>2+</sup> | RE=Mg <sup>2+</sup> | RE=Sr <sup>2+</sup> | RE=Ba <sup>2+</sup> |
|-------------------------------------------------------------------------------------------------------------------------------------------|---------------------|---------------------|---------------------|---------------------|
| O1                                                                                                                                        | 3.066               | 2.722               | 3.122               | 3.025               |
| O2                                                                                                                                        | 3.377               | 1.360               | ---                 | 3.054               |
| O3                                                                                                                                        | 2.972               | 2.746               | 2.947               | 3.130               |
| O3                                                                                                                                        | ---                 | ---                 | ---                 | 2.853               |
| O4                                                                                                                                        | ---                 | 2.370               | 2.845               | 2.967               |
| O4                                                                                                                                        | ---                 | ---                 | 2.95                | ---                 |
| O5                                                                                                                                        | 3.205               | 2.804               | 3.237               | 2.728               |
| O6                                                                                                                                        | 3.231               | ---                 | 2.741               | 2.745               |
| O6                                                                                                                                        | 3.011               | ---                 | ---                 | ---                 |
| O7                                                                                                                                        | 2.578               | 2.634               | 2.647               | 2.500               |
| O8                                                                                                                                        | ---                 | 2.483               | 1.183               | ---                 |
| O9                                                                                                                                        | 3.486               | ---                 | ---                 | ---                 |
| O10                                                                                                                                       | 1.875               | 2.444               | 1.998               | 1.988               |
| O10                                                                                                                                       | ---                 | 2.576               | ---                 | ---                 |
| Average value (Å)                                                                                                                         | 2.977               | 2.459               | 2.630               | 2.776               |

Note: "----" represents there is no connection between Ca3/Eu3 and the corresponding oxygen.

Table S4 The bond length of Mn-O in  $(\text{Ca, Mg, Sr, Ba})_{8.84}\text{Ce}(\text{PO}_4)_7:0.16\text{Mn}^{2+}$ .

| Distance of Ca3/Mn3-O <sub>i</sub> in [Ca3/Mn3-O] polyhedron in $\text{Ca}_{8.24}\text{Ce}(\text{PO}_4)_7:0.16\text{Mn}^{2+}$ , 0.6RE (Å) | RE=Ca <sup>2+</sup> | RE=Mg <sup>2+</sup> | RE=Sr <sup>2+</sup> | RE=Ba <sup>2+</sup> |
|-------------------------------------------------------------------------------------------------------------------------------------------|---------------------|---------------------|---------------------|---------------------|
| O1                                                                                                                                        | 2.667               | 2.732               | 2.636               | 3.334               |
| O2                                                                                                                                        | 3.605               | 3.678               | 3.001               | ---                 |
| O3                                                                                                                                        | 2.95                | 1.68                | 2.903               | 2.516               |
| O4                                                                                                                                        | 2.516               | 1.781               | 2.381               | 2.857               |
| O5                                                                                                                                        | 2.323               | 2.449               | 2.546               | 2.506               |
| O6                                                                                                                                        | ---                 | ---                 | ---                 | 2.396               |
| O7                                                                                                                                        | 2.537               | 2.366               | 2.353               | 2.258               |
| O8                                                                                                                                        | 2.056               | 2.577               | 2.586               | 2.198               |
| O10                                                                                                                                       | 2.395               | 2.685               | 2.314               | 2.723               |
| O10                                                                                                                                       | 2.621               | 2.674               | 2.86                | 2.867               |
| Average value (Å)                                                                                                                         | 2.630               | 2.513               | 2.620               | 2.628               |

Note: "----" represents there is no connection between Ca3/Mn3 and the corresponding oxygen.

Table S5 The side length of [Eu-O] polyhedron in  $(\text{Ca, Mg, Sr, Ba})_{8.94}\text{Ce}(\text{PO}_4)_7:0.06\text{Eu}^{2+}$ .

| Distance of $\text{O}_i\text{-O}_j$ in [Ca3/Eu3-O] polyhedron in CCPO:0.06Eu <sup>2+</sup> (Å) |        | Distance of $\text{O}_i\text{-O}_j$ in [Ca3/Eu3-O] polyhedron in CCPO:0.06Eu <sup>2+</sup> , 0.6Mg <sup>2+</sup> (Å) |        | Distance of $\text{O}_i\text{-O}_j$ in [Ca3/Eu3-O] polyhedron in CCPO:0.06Eu <sup>2+</sup> , 0.6Sr <sup>2+</sup> (Å) |        | Distance of $\text{O}_i\text{-O}_j$ in [Ca3/Eu3-O] polyhedron in CCPO:0.06Eu <sup>2+</sup> , 0.6Ba <sup>2+</sup> (Å) |        |
|------------------------------------------------------------------------------------------------|--------|----------------------------------------------------------------------------------------------------------------------|--------|----------------------------------------------------------------------------------------------------------------------|--------|----------------------------------------------------------------------------------------------------------------------|--------|
| O5-O6                                                                                          | 2.2823 | O7-O8                                                                                                                | 2.8502 | O10-O7                                                                                                               | 2.5771 | O4-O5                                                                                                                | 3.1716 |
| O5-O9                                                                                          | 4.7117 | O7-O10                                                                                                               | 2.9019 | O10-O6                                                                                                               | 2.6506 | O4-O6                                                                                                                | 3.6819 |
| O5-O1                                                                                          | 4.3545 | O7-O1                                                                                                                | 3.9123 | O10-O1                                                                                                               | 2.8886 | O4-O1                                                                                                                | 4.1767 |
| O5-O6                                                                                          | 4.2700 | O7-O3                                                                                                                | 2.8636 | O8-O7                                                                                                                | 3.4168 | O4-O10                                                                                                               | 2.6711 |
| O2-O6                                                                                          | 3.8226 | O8-O2                                                                                                                | 2.2849 | O8-O3                                                                                                                | 2.9322 | O4-O3                                                                                                                | 2.9837 |
| O2-O9                                                                                          | 3.8900 | O8-O10                                                                                                               | 2.9762 | O8-O1                                                                                                                | 2.5813 | O5-O6                                                                                                                | 1.6237 |
| O2-O6                                                                                          | 4.7549 | O8-O1                                                                                                                | 4.1729 | O7-O3                                                                                                                | 3.8633 | O5-O3                                                                                                                | 3.128  |
| O2-O7                                                                                          | 2.6409 | O8-O3                                                                                                                | 4.0277 | O7-O4                                                                                                                | 3.2376 | O5-O1                                                                                                                | 4.0495 |
| O2-O3                                                                                          | 1.8868 | O2-O4                                                                                                                | 2.4614 | O7-O6                                                                                                                | 3.3293 | O6-O3                                                                                                                | 1.8754 |
| O6-O9                                                                                          | 3.7781 | O2-O10                                                                                                               | 3.3631 | O7-O1                                                                                                                | 5.0687 | O6-O3                                                                                                                | 4.3305 |
| O6-O6                                                                                          | 4.6995 | O2-O5                                                                                                                | 3.8542 | O3-O4                                                                                                                | 2.2516 | O6-O2                                                                                                                | 3.5116 |
| O6-O3                                                                                          | 2.4372 | O2-O3                                                                                                                | 2.1412 | O3-O4                                                                                                                | 4.507  | O3-O1                                                                                                                | 5.5807 |
| O9-O1                                                                                          | 4.4267 | O4-O10                                                                                                               | 2.8933 | O3-O5                                                                                                                | 4.1366 | O3-O2                                                                                                                | 2.3574 |
| O9-O7                                                                                          | 4.6807 | O4-O5                                                                                                                | 3.3549 | O3-O1                                                                                                                | 5.4949 | O1-O10                                                                                                               | 2.7444 |
| O9-O3                                                                                          | 2.4804 | O4-O3                                                                                                                | 1.9658 | O4-O4                                                                                                                | 3.4675 | O1-O7                                                                                                                | 4.6392 |
| O1-O6                                                                                          | 5.0603 | O10-O1                                                                                                               | 2.3397 | O4-O5                                                                                                                | 2.5121 | O1-O2                                                                                                                | 5.7903 |
| O1-O7                                                                                          | 4.8551 | O10-O5                                                                                                               | 3.3508 | O4-O6                                                                                                                | 0.9066 | O10-O3                                                                                                               | 2.5139 |
| O1-O10                                                                                         | 2.7273 | O10-O3                                                                                                               | 3.5154 | O4-O5                                                                                                                | 4.0862 | O10-O7                                                                                                               | 2.5067 |
| O6-O7                                                                                          | 3.4713 | O10-O1                                                                                                               | 2.3398 | O6-O5                                                                                                                | 4.087  | O3-O7                                                                                                                | 1.9736 |
| O6-O3                                                                                          | 5.1203 | O10-O5                                                                                                               | 2.5911 | O6-O1                                                                                                                | 4.6951 | O3-O2                                                                                                                | 3.7443 |
| O6-O10                                                                                         | 2.9551 | O1-O5                                                                                                                | 2.4452 | O5-O1                                                                                                                | 4.1917 | O7-O2                                                                                                                | 2.7901 |
| O7-O10                                                                                         | 2.522  |                                                                                                                      |        |                                                                                                                      |        |                                                                                                                      |        |
| Standard Deviation                                                                             | 1.024  |                                                                                                                      | 0.641  |                                                                                                                      | 1.047  |                                                                                                                      | 1.108  |

Table S6 The side length of [Mn-O] polyhedron in  $(\text{Ca, Mg, Sr, Ba})_{8.84}\text{Ce}(\text{PO}_4)_7:0.16\text{Mn}^{2+}$ .

| Distance of $\text{O}_i\text{-O}_j$ in [Ca3/Mn3-O] polyhedron in CCPO:0.16Mn <sup>2+</sup> (Å) |        | Distance of $\text{O}_i\text{-O}_j$ in [Ca3/Mn3-O] polyhedron in CCPO:0.16Mn <sup>2+</sup> , 0.6Mg <sup>2+</sup> (Å) |        | Distance of $\text{O}_i\text{-O}_j$ in [Ca3/Mn3-O] polyhedron in CCPO:0.16Mn <sup>2+</sup> , 0.6Sr <sup>2+</sup> (Å) |        | Distance of $\text{O}_i\text{-O}_j$ in [Ca3/Mn3-O] polyhedron in CCPO:0.16Mn <sup>2+</sup> , 0.6Ba <sup>2+</sup> (Å) |        |
|------------------------------------------------------------------------------------------------|--------|----------------------------------------------------------------------------------------------------------------------|--------|----------------------------------------------------------------------------------------------------------------------|--------|----------------------------------------------------------------------------------------------------------------------|--------|
| O4-O5                                                                                          | 2.7686 | O7-O10                                                                                                               | 2.7885 | O1-O10                                                                                                               | 2.6543 | O10-O7                                                                                                               | 2.1522 |
| O4-O3                                                                                          | 2.2068 | O7-O8                                                                                                                | 3.3834 | O1-O8                                                                                                                | 3.4997 | O10-O1                                                                                                               | 3.3883 |
| O4-O2                                                                                          | 3.4803 | O7-O4                                                                                                                | 2.7948 | O1-O10                                                                                                               | 2.6542 | O10-O6                                                                                                               | 2.8642 |
| O10-O7                                                                                         | 2.5496 | O7-O1                                                                                                                | 3.481  | O1-O2                                                                                                                | 2.5245 | O10-O4                                                                                                               | 3.1202 |
| O10-O1                                                                                         | 2.4457 | O7-O2                                                                                                                | 4.1086 | O4-O5                                                                                                                | 2.7142 | O8-O7                                                                                                                | 2.5024 |
| O10-O3                                                                                         | 3.2108 | O10-O4                                                                                                               | 2.7259 | O4-O7                                                                                                                | 3.6302 | O8-O10                                                                                                               | 2.5031 |
| O10-O2                                                                                         | 3.3316 | O10-O5                                                                                                               | 3.8829 | O4-O10                                                                                                               | 3.2449 | O8-O1                                                                                                                | 4.4772 |
| O7-O1                                                                                          | 3.9916 | O10-O1                                                                                                               | 2.6241 | O4-O3                                                                                                                | 4.2094 | O8-O3                                                                                                                | 3.0599 |
| O7-O8                                                                                          | 2.408  | O8-O10                                                                                                               | 1.8905 | O4-O2                                                                                                                | 2.8126 | O8-O4                                                                                                                | 4.0322 |
| O7-O10                                                                                         | 4.3143 | O8-O1                                                                                                                | 3.2526 | O10-O5                                                                                                               | 3.0166 | O7-O1                                                                                                                | 4.3465 |
| O7-O3                                                                                          | 2.4611 | O8-O2                                                                                                                | 2.5418 | O10-O8                                                                                                               | 2.1977 | O7-O4                                                                                                                | 2.4873 |
| O1-O10                                                                                         | 2.4457 | O4-O3                                                                                                                | 2.779  | O10-O3                                                                                                               | 2.9499 | O10-O1                                                                                                               | 3.3891 |
| O1-O2                                                                                          | 3.1495 | O4-O5                                                                                                                | 3.2867 | O10-O2                                                                                                               | 3.7726 | O10-O5                                                                                                               | 3.1062 |
| O5-O8                                                                                          | 3.0856 | O4-O2                                                                                                                | 4.5865 | O5-O3                                                                                                                | 2.631  | O10-O3                                                                                                               | 4.0845 |
| O5-O10                                                                                         | 3.2466 | O10-O5                                                                                                               | 2.4454 | O5-O2                                                                                                                | 3.2874 | O1-O5                                                                                                                | 3.9159 |
| O5-O2                                                                                          | 3.9653 | O10-O1                                                                                                               | 2.6241 | O7-O8                                                                                                                | 2.8527 | O1-O6                                                                                                                | 3.764  |
| O8-O10                                                                                         | 3.3317 | O10-O2                                                                                                               | 4.0308 | O7-O10                                                                                                               | 2.6835 | O5-O6                                                                                                                | 2.7115 |
| O8-O3                                                                                          | 3.1584 | O3-O5                                                                                                                | 2.3856 | O7-O3                                                                                                                | 4.1959 | O5-O3                                                                                                                | 3.1506 |
| O10-O2                                                                                         | 4.6252 | O3-O2                                                                                                                | 2.7698 | O8-O10                                                                                                               | 4.4139 | O6-O3                                                                                                                | 3.6515 |
| O3-O2                                                                                          | 5.0654 | O5-O1                                                                                                                | 3.2775 | O8-O3                                                                                                                | 3.0501 | O6-O4                                                                                                                | 2.8279 |
|                                                                                                |        |                                                                                                                      |        | O10-O2                                                                                                               | 3.1673 | O3-O4                                                                                                                | 2.8827 |
| Standard Deviation                                                                             | 0.772  |                                                                                                                      | 0.660  |                                                                                                                      | 0.590  |                                                                                                                      | 0.642  |

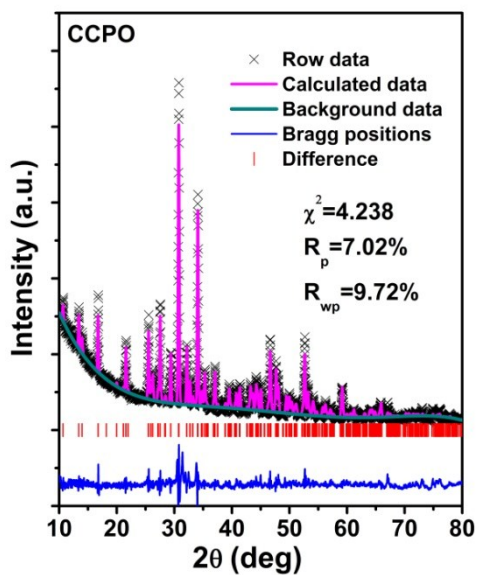

Figure S1 Rietveld refinement of powder XRD profiles of CCPO

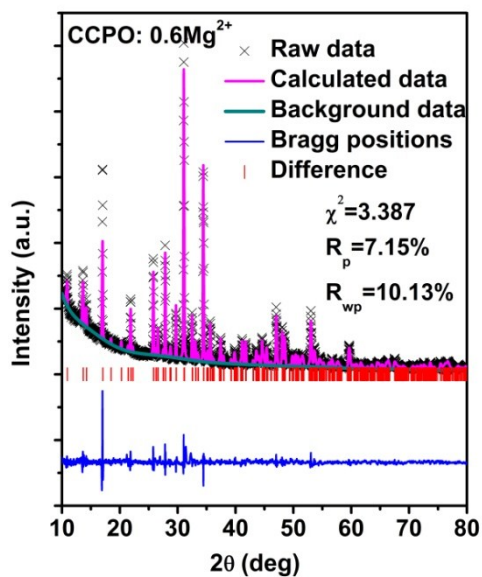

Figure S2 Rietveld refinement of powder XRD profiles of CCPO:0.6Mg<sup>2+</sup>

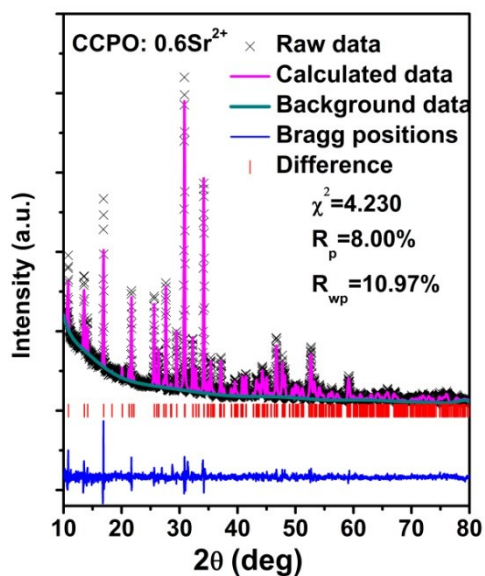

Figure S3 Rietveld refinement of powder XRD profiles of CCPO:0.6Sr<sup>2+</sup>

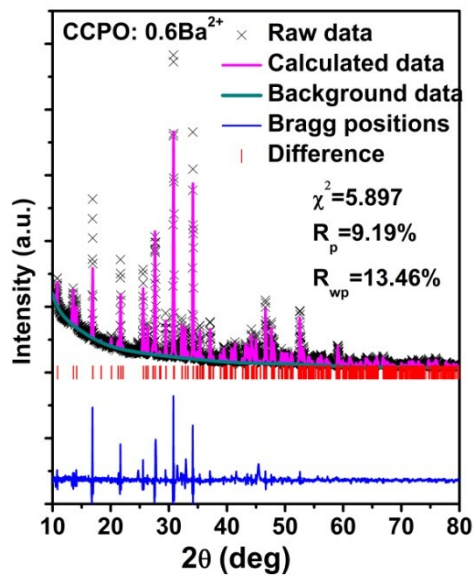

Figure S4 Rietveld refinement of powder XRD profiles of CCPO:0.6Ba<sup>2+</sup>

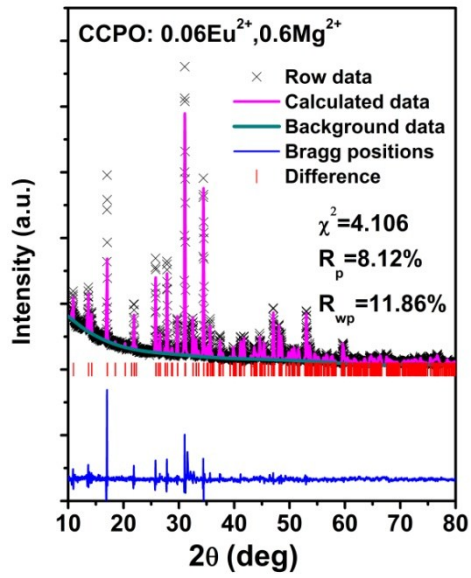

Figure S5 Rietveld refinement of powder XRD profiles of CCPO:0.06Eu<sup>2+</sup>,0.6Mg<sup>2+</sup>

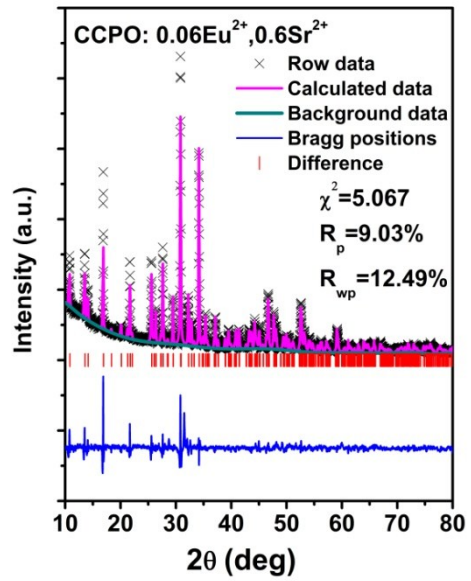

Figure S6 Rietveld refinement of powder XRD profiles of CCPO:0.06Eu<sup>2+</sup>,0.6Sr<sup>2+</sup>

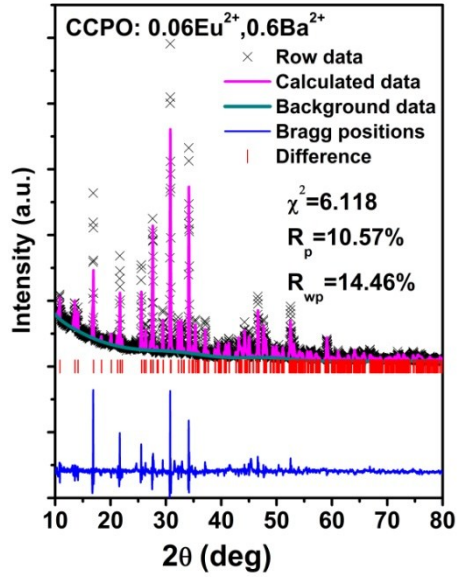

Figure S7 Rietveld refinement of powder XRD profiles of CCPO:0.06Eu<sup>2+</sup>,0.6Ba<sup>2+</sup>

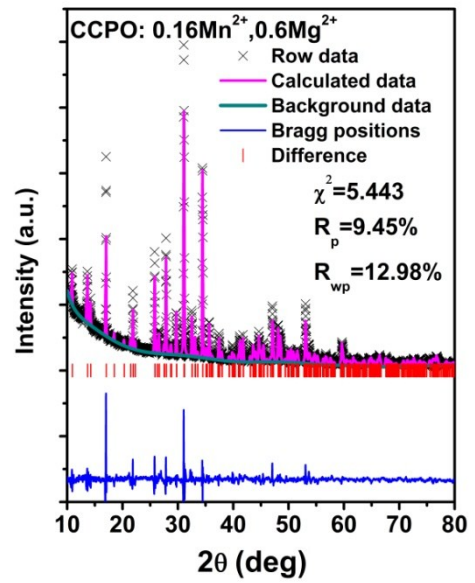

Figure S8 Rietveld refinement of powder XRD profiles of CCPO:0.16Mn<sup>2+</sup>,0.6Mg<sup>2+</sup>

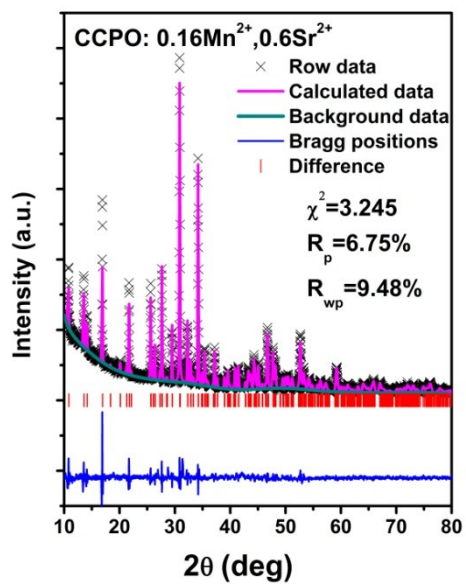

Figure S9 Rietveld refinement of powder XRD profiles of CCPO:0.16Mn<sup>2+</sup>,0.6Sr<sup>2+</sup>

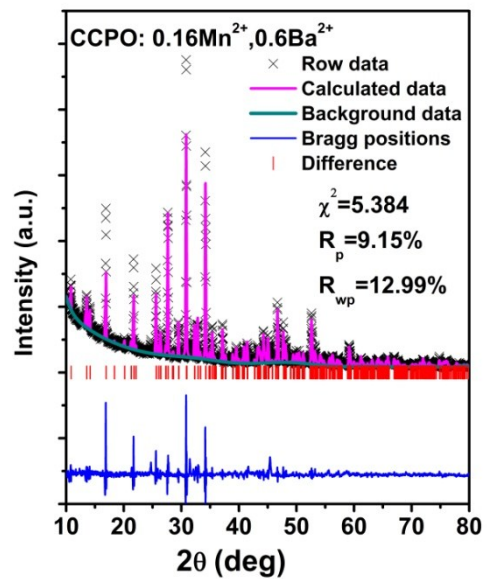

Figure S10 Rietveld refinement of powder XRD profiles of CCPO:0.16Mn<sup>2+</sup>,0.6Ba<sup>2+</sup>
